# Supplementary material
Source: publisher figshare collection journal article supplement (https://asha.figshare.com/articles/dataset/_/12375053)
Supplement: Supplementary file 1 [file 1]

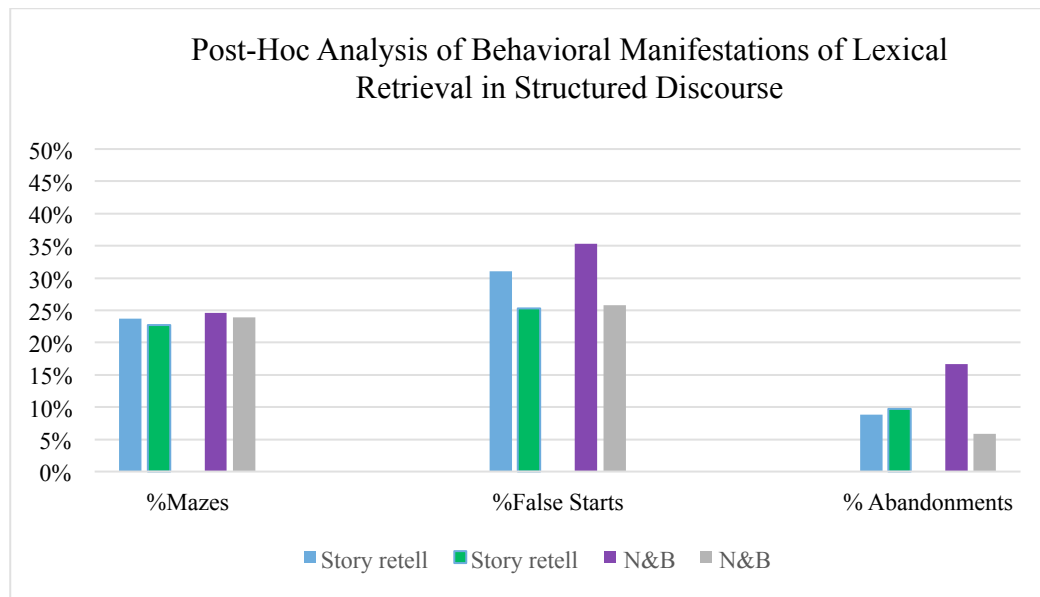

**Supplemental Material S2.** Visual depiction of post-hoc analysis results evaluating the proportion of behavior associated with lexical retrieval difficulty in N&B (Nicholas & Brookshire, 1993) tasks and Story retelling from the Discourse Comprehension Test (Brookshire & Nicholas, 1993).

## References

- Brookshire, R. H., & Nicholas, L. E. (1993). The Discourse Comprehension Test. Communication Skill Builders, A Division of The Psychological Corporation.
- Nicholas, L. E., & Brookshire, R. H. (1993). A system for quantifying the informativeness and efficiency of the connected speech of adults with aphasia. *Journal of Speech, and Hearing Research*, 36(2), 338–350.  
<https://doi.org/10.1044/jshr.3602.338>
