# Supplementary material
Source: publisher figshare collection journal article supplement (https://asha.figshare.com/articles/dataset/_/12375053)
Supplement: Supplementary file 2 [file 1]

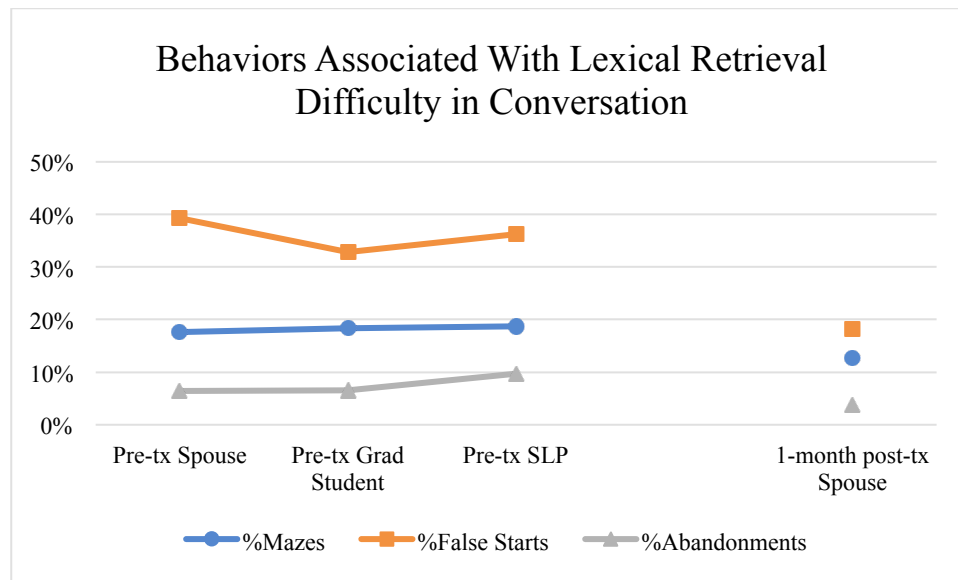

**Supplemental Material S1.** Visual depiction of behaviors associated with lexical retrieval difficulty across three pretreatment conversations and a 1-month posttreatment conversation.
